# Supplementary material for: Cerebrovascular responses to somatomotor stimulation in Parkinson’s disease: A multivariate analysis
Source: PubMed Central journal article supplement — J Cereb Blood Flow Metab. 2022 Mar 15;42(8):1547–58. doi: 10.1177/0271678X211065204 (PMC9274867; doi:10.1177/0271678x211065204), 2022-03-15
Supplement: sj-pdf-1-jcb-10.1177_0271678X211065204.pdf [file sj-pdf-1-jcb-10.1177_0271678X211065204.pdf]

| Reason for exclusion                      | HC (n=55) | PD-medicated (n=49) | PD-unmedicated (n=46) |
|-------------------------------------------|-----------|---------------------|-----------------------|
| Poor quality data                         | 1         | 3                   | 1                     |
| Non-physiological output                  | 3         | 5                   | 7                     |
| No repeated data after initial exclusions | -         | 7                   | 4                     |
| Total exclusions                          | 4         | 15                  | 12                    |
| Final inclusion                           | 51        | 34                  | 34                    |

Suppl. Table S.1 – Reasons for exclusion following visual inspection of data and assessment of model outputs. HC: healthy controls; PD-medicated: Parkinson’s disease patients with medication ON; PD-unmedicated: Parkinson’s patients with medication OFF.
